# Supplementary material for: Rate-Independent Constructs for Chemical Computation
Source: PubMed Central journal article supplement (PMC3127954; doi:10.1371/journal.pone.0021414), 2011-06-30
Supplement: pone.0021414.s001.pdf [file pone.0021414.s001.pdf]

# Rate-Independent Constructs for Chemical Computation

Phillip Senum, Marc Riedel

Department of Electrical and Computer Engineering, University of Minnesota, Minneapolis, Minnesota, United States

E-mail: { senu0004, mriedel }@umn.edu

## Appendix: Module Reference

### Absence Indicator

Generates  $a_{ab}$  in the absence of  $a$ , and consumes  $a_{ab}$  in the presence of  $a$  without modifying  $a$ .

#### Reactions

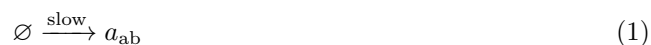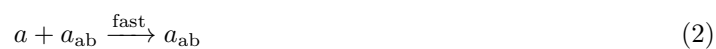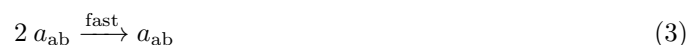

### Copier

Adds the value stored in  $y$  to  $z$  in the presence of  $g$ , preserving the initial quantity of  $y$ .

#### Reactions

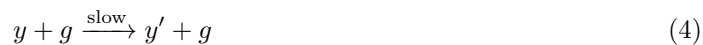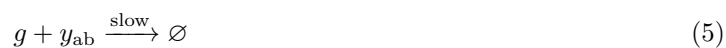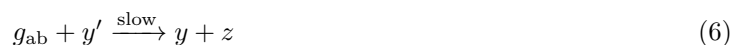

### Absence Indicators

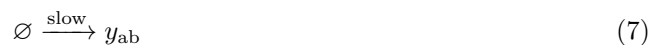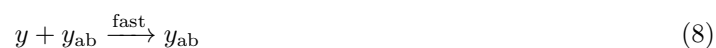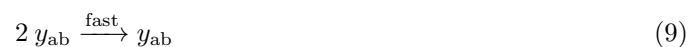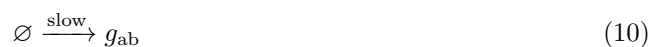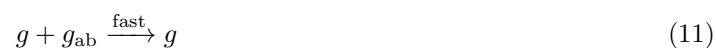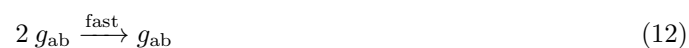

### Multiply by Two

Takes the value stored in  $y$  and doubles it in the presence of  $g$ , putting the result back in  $y$ .

**Reactions**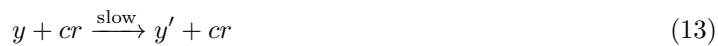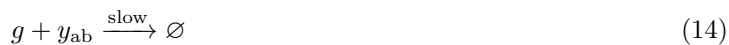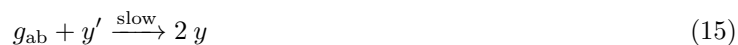

**Absence Indicators** Same as for “Copier.”

**Decrement**

Takes the values of  $x$  and subtracts 1 from it in the presence of  $g$ , putting the result back in  $x$ .

**Reactions**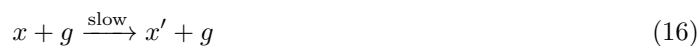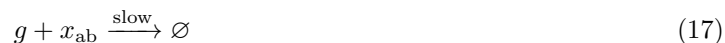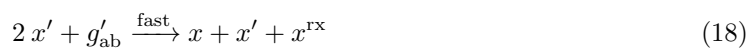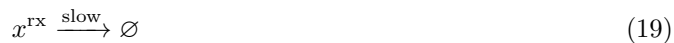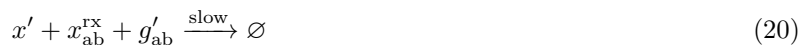**Absence Indicators**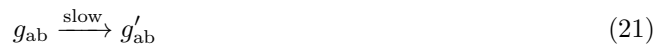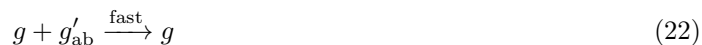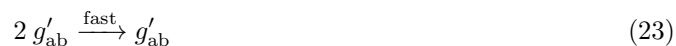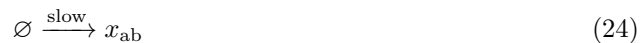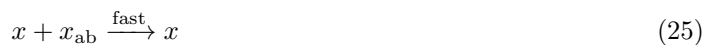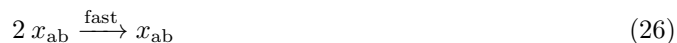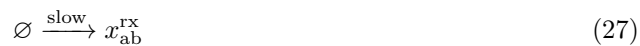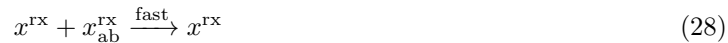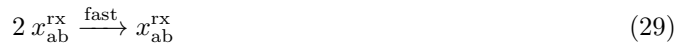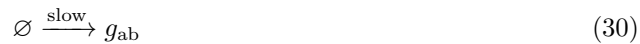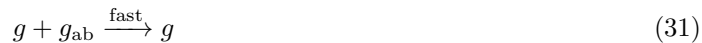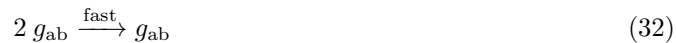**Increment**

Takes the values of  $x$  and adds 1 to it in the presence of  $g$ , putting the result back in  $x$ .

**Reactions**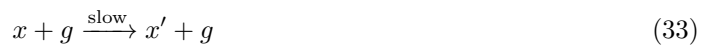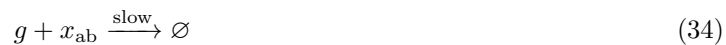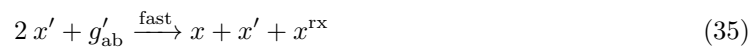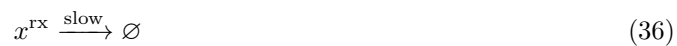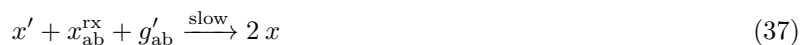

**Absence Indicators** Same as for “Decrement.”

**Divide by Two**

Takes the values of  $x$  and halves it in the presence of  $g$ , putting the result back in  $x$ .

**Reactions**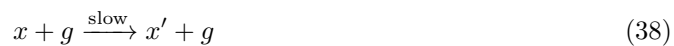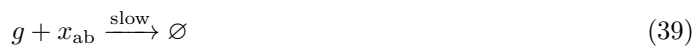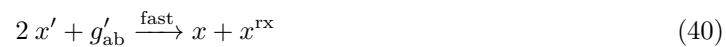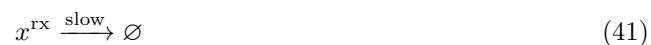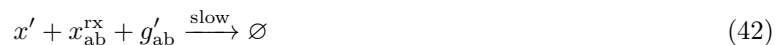

**Absence Indicators** Same as for “Decrement.”
