# Supplementary material for: Rate-Independent Constructs for Chemical Computation
Source: PubMed Central journal article supplement (PMC3127954; doi:10.1371/journal.pone.0021414), 2011-06-30
Supplement: pone.0021414.s002.pdf [file pone.0021414.s002.pdf]

## Rate-Independent Constructs for Chemical Computation

Phillip Senum, Marc Riedel

Department of Electrical and Computer Engineering, University of Minnesota, Minneapolis, Minnesota, United States

E-mail: { senu0004, mriedel }@umn.edu

### Appendix: Multiplication Reactions

**System Initialization** We use a small set of reactions to implement the iterative loop of the operation.

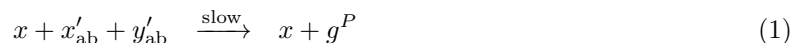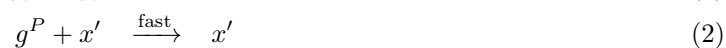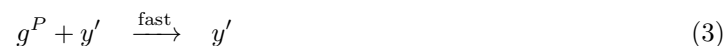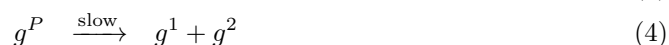

**Copying** We use our copier module to implement the line of pseudo-code  $z = z + y$ .

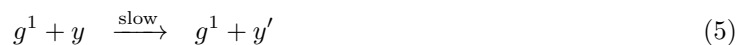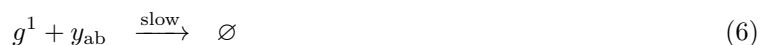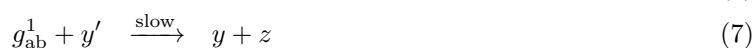

**Decrement** We use our decrement module to implement the line of pseudo-code  $x = x - 1$ .

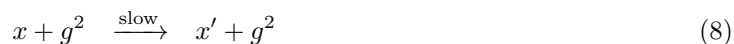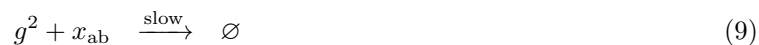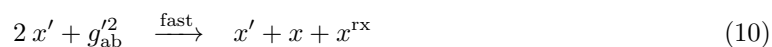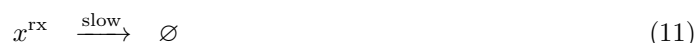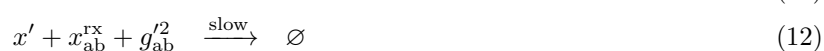

**Absence Indicators** Four absence indicators are needed by this system; they are of the same form as all others described in this paper.
