# Supplementary material for: Rate-Independent Constructs for Chemical Computation
Source: PubMed Central journal article supplement (PMC3127954; doi:10.1371/journal.pone.0021414), 2011-06-30
Supplement: pone.0021414.s004.pdf [file pone.0021414.s004.pdf]

## Rate-Independent Constructs for Chemical Computation

Phillip Senum, Marc Riedel

Department of Electrical and Computer Engineering, University of Minnesota, Minneapolis, Minnesota, United States

E-mail: { senu0004, mriedel }@umn.edu

### Appendix: Exponentiation Reactions

We present chemical reactions that implement the pseudo-code presented in the text.

**System Initialization** As with our multiplication module, we have a small set of reactions to control the overall timing.

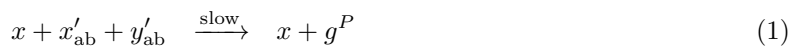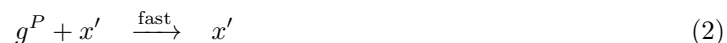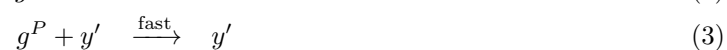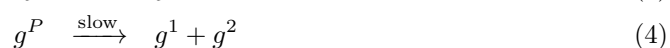

**Doubling** We use a slight variation of our copier module to implement the line of pseudo-code  $y = 2 * y$ .

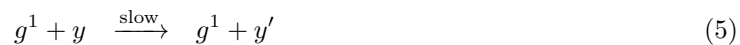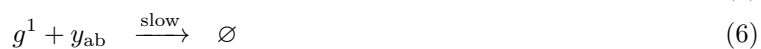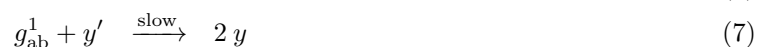

**Decrement** As with our multiplication module, we decrement  $x$  once each loop.

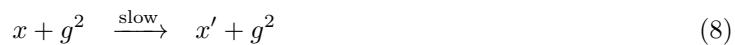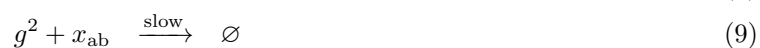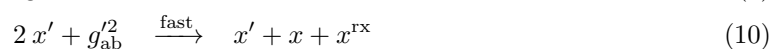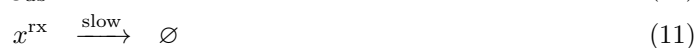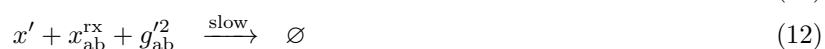

**Absence Indicators** Four absence indicators are needed by this system; they are of the same form as all others described in this paper.
