# Supplementary material for: Rate-Independent Constructs for Chemical Computation
Source: PubMed Central journal article supplement (PMC3127954; doi:10.1371/journal.pone.0021414), 2011-06-30
Supplement: pone.0021414.s005.pdf [file pone.0021414.s005.pdf]

## Rate-Independent Constructs for Chemical Computation

Phillip Senum, Marc Riedel

Department of Electrical and Computer Engineering, University of Minnesota, Minneapolis, Minnesota,  
United States

E-mail: { senu0004, mriedel }@umn.edu

### Appendix: Logarithm Reactions

We present chemical reactions that implement the pseudo-code presented in the text.

**System Initialization** As with our other modules, we have a small set of reactions to control the overall timing of our system.

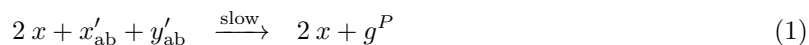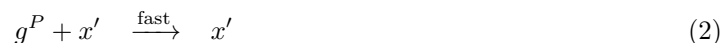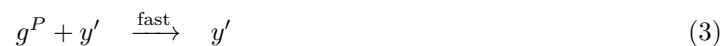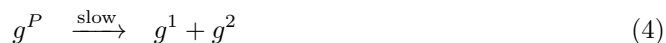

**Halving** We use a slight variation of our decrement module to implement the operation  $x = x / 2$ .

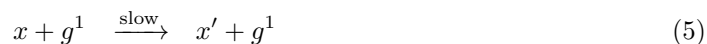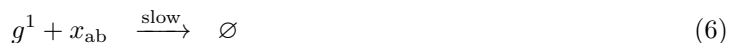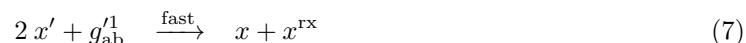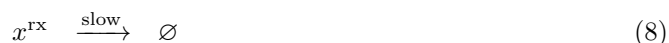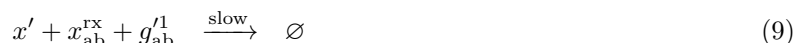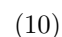

**Increment** We use our increment module to implement the line  $y = y + 1$ . We set  $y$  to be 1 initially.

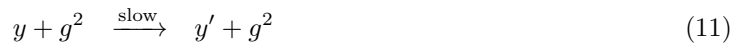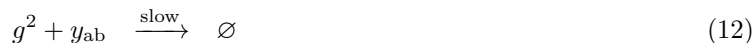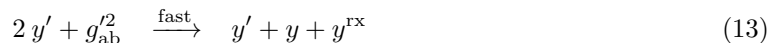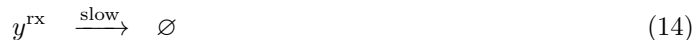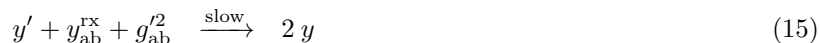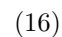

**Cleanup** Once the module has completed, we decrement  $y$  by one, storing the result in  $y_f$ .

$$x'_{ab} + y'_{ab} \xrightarrow{\text{slow}} done^P \quad (17)$$

$$done^P + 2x \xrightarrow{\text{fast}} 2x \quad (18)$$

$$done^P + x' \xrightarrow{\text{fast}} x' \quad (19)$$

$$done^P + y' \xrightarrow{\text{fast}} y' \quad (20)$$

$$done^P \xrightarrow{\text{slow}} done \quad (21)$$

$$2done \xrightarrow{\text{fast}} done \quad (22)$$

$$done + 2y \xrightarrow{\text{slow}} y + y_f \quad (23)$$

**Absence Indicators** Two special absence indicators are used by the halving and increment modules above; a total of 13 are needed for the system to function properly. They are of the same form as all other absence indicators, described in the paper.
